# Supplementary material
Source: MDPI journal article supplement (https://www.mdpi.com/2311-5637/7/4/294)
Supplement: s1 [file s1]

**Table S1.** Composition of basal diet (wt %)

| Ingredient               |                            | Basal diet<br>(high-fat diet) |
|--------------------------|----------------------------|-------------------------------|
| Fat                      | Beef tallow                | 30.0                          |
| Protein &<br>amino acids | Casein                     | 20.0                          |
|                          | L-Cystine                  | 0.3                           |
| Vitamins                 | Vitamin mixture (AIN-93)*  | 1.0                           |
| Minerals                 | Mineral mixture (AIN-93G)* | 3.5                           |
| Carbohydrate             | Dietary fiber (Cellulose)  | 5.0                           |
|                          | Sucrose                    | 20.0                          |
|                          | Corn starch                | 20.2                          |

\*American Institute for Nutrition (AIN-93).

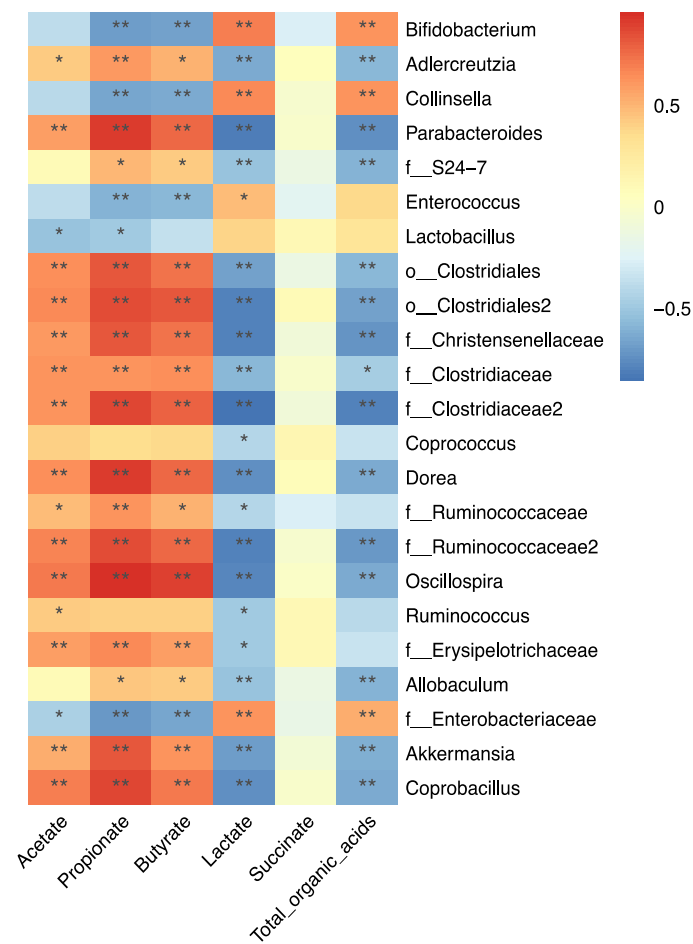

**Figure S1.** Correlation matrix (correlation coefficient,  $r$ ) between cecal levels of organic acids and microbiota composition. The deep color bars indicate correlation strength. \* $p < 0.05$ , \*\* $p < 0.01$ .
